# Supplementary material
Source: Springer Nature journal article supplement (https://www.springermedizin.de/resource/supplementary/12968_2008_63_MOESM4_ESM.pdf/9577908)

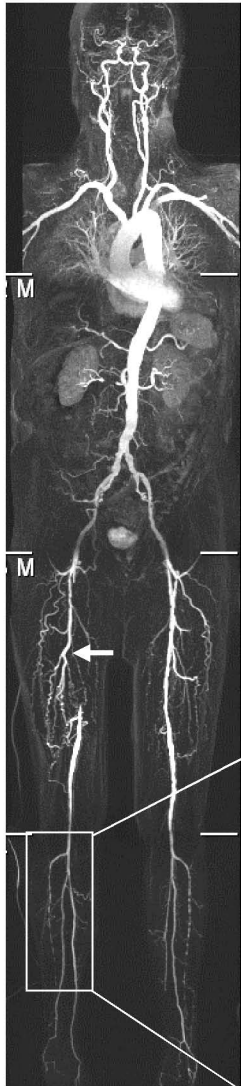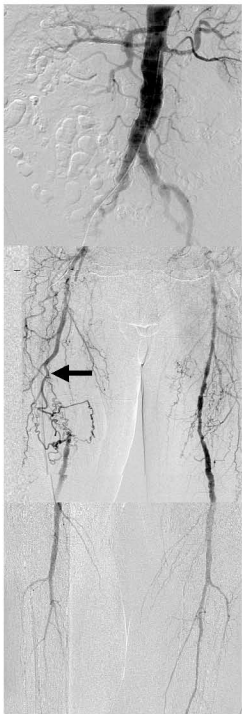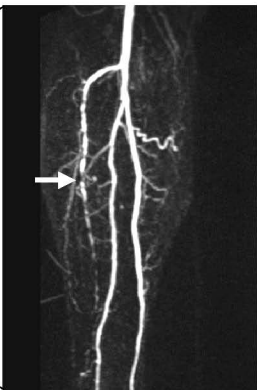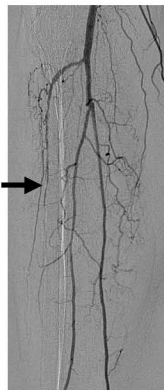

Supplement: MOESM4 [file 9577908]
